# Supplementary material
Source: PubMed Central journal article supplement (PMC6357971)
Supplement: NIHMS997846-supplement-S1.pdf [file NIHMS997846-supplement-S1.pdf]

## Supplementary Tables

**Table S1.** BALF multiplex protein analysis following 300 µg exposure to pre- and post-incinerated organomodified nanoclay to C57BL/6J mice.

| Protein     | Day 1         |              |              |              |               | Day 7        |              |              |              |               | Day 28       |              |              |              |              |
|-------------|---------------|--------------|--------------|--------------|---------------|--------------|--------------|--------------|--------------|---------------|--------------|--------------|--------------|--------------|--------------|
|             | Clois Na      | Clois 30B    | I-Clois Na   | I-Clois 30B  | CS            | Clois Na     | Clois 30B    | I-Clois Na   | I-Clois 30B  | CS            | Clois Na     | Clois 30B    | I-Clois Na   | I-Clois 30B  | CS           |
| Eotaxin     | <b>5.56*</b>  | 1.60         | <b>3.31*</b> | <b>1.90*</b> | 1.91          | 2.19         | <b>3.10*</b> | -2.14        | -2.14        | 1.14          | 0.00         | 0.00         | 0.00         | 2.40         | <b>3.29*</b> |
| FGFβ        | 0.16          | -0.63        | -0.20        | -0.91        | -1.14         | 0.11         | -0.76        | -0.17        | -1.10        | -0.62         | -0.54        | -0.93        | -0.54        | 0.15         | -0.26        |
| GM-CSF      | <b>4.22*</b>  | <b>2.05*</b> | <b>1.78*</b> | <b>1.56*</b> | <b>3.28*</b>  | 0.38         | 0.49         | -0.34        | -0.11        | 0.96          | -0.06        | 0.17         | -0.17        | 0.76         | <b>1.96*</b> |
| IL-10       | 0.58          | -0.09        | 0.19         | -0.23        | -0.07         | -0.35        | -0.43        | -0.54        | -0.92        | -0.77         | 0.00         | -0.24        | -0.48        | 0.34         | 0.33         |
| IL-12 p70   | 0.27          | -0.03        | -0.01        | -0.09        | -0.18         | -0.15        | -0.21        | -0.38        | -0.26        | <b>-0.45*</b> | 0.12         | -0.21        | -0.22        | -0.13        | -0.15        |
| Il-13       | 1.62          | 1.46         | <b>2.11*</b> | 1.15         | 0.06          | 0.95         | 0.60         | 0.42         | -0.26        | <b>-1.80*</b> | 0.55         | 0.55         | 0.55         | 1.55         | 0.84         |
| IL-1β       | <b>0.69*</b>  | -0.18        | <b>1.22*</b> | 0.27         | 0.61          | 0.37         | 0.00         | -0.16        | -0.72        | -0.97         | 0.53         | -0.24        | 0.00         | 0.38         | 0.11         |
| IL-6        | <b>7.92*</b>  | <b>2.30*</b> | <b>3.16*</b> | <b>1.74*</b> | <b>1.71*</b>  | 0.61         | <b>1.12*</b> | -0.22        | -0.05        | 0.41          | 0.42         | 0.38         | 0.16         | <b>0.63*</b> | <b>0.87*</b> |
| KC/GRO      | <b>2.82*</b>  | <b>1.53*</b> | <b>3.70*</b> | 2.28         | <b>1.85*</b>  | 1.10         | 1.69         | -0.43        | -0.19        | <b>2.12*</b>  | 0.44         | 0.67         | 0.50         | <b>1.63*</b> | <b>3.71*</b> |
| MCP1        | <b>5.43*</b>  | 0.08         | <b>2.79*</b> | 1.22         | 1.28          | <b>6.48*</b> | <b>8.83*</b> | -2.14        | 3.01         | <b>7.41*</b>  | -2.00        | 0.48         | -2.00        | <b>2.67*</b> | <b>3.41*</b> |
| MDC         | <b>3.42*</b>  | 0.75         | <b>5.38*</b> | <b>3.59*</b> | <b>2.39*</b>  | <b>1.36*</b> | <b>1.36*</b> | 0.01         | 1.08         | <b>2.13*</b>  | -0.05        | 0.99         | 0.70         | <b>1.53*</b> | <b>2.94*</b> |
| MIP-1α      | <b>4.81*</b>  | <b>5.15*</b> | <b>6.53*</b> | <b>5.83*</b> | <b>6.60*</b>  | <b>5.56*</b> | <b>4.96*</b> | 2.11         | 3.28         | <b>5.15*</b>  | <b>2.82*</b> | <b>4.51*</b> | <b>3.62*</b> | <b>4.89*</b> | <b>5.55*</b> |
| MIP-2       | <b>4.20*</b>  | <b>3.05*</b> | <b>6.82*</b> | <b>5.45*</b> | <b>5.86*</b>  | <b>4.36*</b> | <b>3.33*</b> | -0.69        | 0.60         | <b>3.97*</b>  | <b>2.08*</b> | <b>2.11*</b> | 0.98         | <b>2.30*</b> | <b>3.94*</b> |
| MMP9        | <b>11.01*</b> | <b>8.23*</b> | <b>7.96*</b> | <b>9.45*</b> | <b>10.26*</b> | <b>6.96*</b> | <b>5.90*</b> | -0.39        | 2.07         | <b>6.76*</b>  | <b>4.68*</b> | <b>5.30*</b> | <b>2.74*</b> | <b>6.71*</b> | <b>8.54*</b> |
| Osteopontin | <b>0.74*</b>  | 0.65         | 0.33         | 0.51         | 0.60          | <b>1.06*</b> | <b>0.80*</b> | 0.05         | 0.30         | <b>0.83*</b>  | <b>1.05*</b> | <b>1.10*</b> | 0.51         | <b>0.82*</b> | <b>1.06*</b> |
| PDGF-bb     | <b>1.30*</b>  | 0.46         | 0.16         | 0.47         | -0.55         | <b>2.51*</b> | <b>1.98*</b> | -0.21        | 0.72         | 0.13          | 1.49         | <b>2.33*</b> | 0.81         | 1.46         | 1.31         |
| TGFβ        | <b>1.24*</b>  | 0.36         | <b>1.87*</b> | <b>1.08*</b> | <b>0.65*</b>  | <b>1.11*</b> | <b>0.84*</b> | <b>0.76*</b> | <b>0.59*</b> | <b>1.06*</b>  | <b>0.72*</b> | <b>0.60*</b> | 0.36         | 0.48         | 0.53         |
| Timp-1      | <b>7.68*</b>  | <b>5.83*</b> | <b>6.10*</b> | <b>5.05*</b> | <b>5.09*</b>  | <b>3.35*</b> | <b>3.01*</b> | -0.02        | 0.30         | <b>2.34*</b>  | 1.40         | 1.77         | 0.94         | <b>2.71*</b> | <b>3.12*</b> |
| TNFα        | <b>3.35*</b>  | <b>2.84*</b> | <b>4.38*</b> | <b>3.77*</b> | <b>4.59*</b>  | <b>3.91*</b> | <b>4.03*</b> | 1.17         | 2.24         | <b>5.00*</b>  | 0.97         | 2.36         | 1.51         | <b>3.10*</b> | <b>3.99*</b> |
| VEGF        | <b>3.99*</b>  | <b>1.84*</b> | <b>2.30*</b> | <b>1.79*</b> | <b>2.22*</b>  | 0.62         | 0.14         | -0.54        | -0.32        | 0.00          | -0.14        | -0.14        | -0.25        | 0.07         | <b>1.02*</b> |

Values represent Log<sub>2</sub>-fold change compared to time-associated vehicle control.

Bold font with \* indicates significant difference from saline vehicle control (n=8; p<0.05).

**Table S2.** BALF multiplex protein analysis following 30 µg exposure to pre- and post-incinerated organomodified nanoclay to C57BL/6J mice.

| Protein     | Day 1        |              |            |              |              | Day 7        |              |              |             |              | Day 28       |              |            |             |              |
|-------------|--------------|--------------|------------|--------------|--------------|--------------|--------------|--------------|-------------|--------------|--------------|--------------|------------|-------------|--------------|
|             | Clois Na     | Clois 30B    | I-Clois Na | I-Clois 30B  | CS           | Clois Na     | Clois 30B    | I-Clois Na   | I-Clois 30B | CS           | Clois Na     | Clois 30B    | I-Clois Na | I-Clois 30B | CS           |
| Eotaxin     | <b>5.36*</b> | -0.39        | -0.80      | -3.39        | -1.40        | 0.34         | -1.14        | -2.14        | -2.14       | -2.14        | 0.00         | 0.00         | 0.00       | 1.00        | 1.79         |
| FGFβ        | -0.51        | -0.73        | -1.00      | -1.20        | -1.49        | -0.07        | -0.07        | -0.02        | -0.29       | -0.96        | -0.53        | -0.90        | -0.37      | 0.00        | 0.15         |
| GM-CSF      | 1.24         | 0.33         | -0.33      | -0.67        | -0.02        | -0.01        | -0.30        | -0.47        | -0.54       | -0.18        | 0.00         | -0.42        | 0.02       | 0.38        | 0.62         |
| IL-10       | -0.01        | -0.30        | -0.34      | -0.53        | -0.88        | -0.14        | -0.57        | -0.63        | -1.04       | -0.77        | -0.44        | -0.02        | -0.11      | 0.41        | 0.22         |
| IL-12 p70   | -0.09        | -0.16        | -0.19      | -0.17        | -0.30        | -0.29        | -0.13        | -0.29        | -0.35       | -0.43        | -0.09        | -0.09        | -0.12      | -0.21       | -0.20        |
| Il-13       | 1.65         | 0.72         | 0.00       | -0.75        | -1.22        | 0.82         | -0.86        | -0.30        | -0.93       | -0.30        | 0.00         | 0.55         | 0.55       | 1.16        | 1.32         |
| IL-1β       | 0.12         | -0.24        | -0.56      | -1.12        | -1.12        | -0.38        | -0.58        | -0.58        | -0.58       | -0.58        | -0.35        | 0.46         | 0.21       | 0.35        | -0.21        |
| IL-6        | <b>2.55*</b> | 0.10         | -0.31      | -0.32        | -0.39        | -0.19        | -0.10        | -0.14        | -0.20       | -0.06        | 0.26         | 0.20         | 0.05       | 0.40        | 0.59         |
| KC/GRO      | 0.91         | 0.18         | -0.82      | -0.74        | -0.65        | -0.33        | -0.43        | -0.19        | -1.31       | 0.13         | -0.59        | -0.61        | -0.43      | -0.15       | 1.05         |
| MCP1        | <b>2.81*</b> | -0.51        | -0.51      | -0.63        | -1.98        | 3.86         | -2.14        | 3.86         | -2.14       | -2.14        | -2.00        | -2.00        | -2.00      | -2.00       | -2.00        |
| MDC         | <b>2.61*</b> | 0.38         | -0.21      | -0.24        | -0.09        | 0.54         | 0.26         | -0.10        | 0.09        | 0.62         | -0.03        | 0.21         | 0.55       | 0.22        | <b>1.09*</b> |
| MIP-1α      | <b>4.73*</b> | <b>2.73*</b> | 1.49       | <b>1.79*</b> | <b>2.52*</b> | 1.35         | <b>2.05*</b> | <b>1.07*</b> | 1.64        | <b>2.95*</b> | 0.47         | <b>2.27*</b> | 1.85       | 1.96        | <b>3.47*</b> |
| MIP-2       | <b>3.66*</b> | 1.16         | 0.23       | 0.24         | 0.86         | 0.34         | 0.17         | -0.14        | 0.34        | 1.67         | 0.25         | 0.85         | 0.38       | 0.85        | <b>2.05*</b> |
| MMP9        | <b>8.58*</b> | <b>3.98*</b> | 2.69       | 1.86         | 3.39         | -0.04        | -0.78        | -0.50        | 0.22        | 2.25         | 0.95         | 0.97         | 0.98       | 1.43        | <b>3.43*</b> |
| Osteopontin | <b>1.49*</b> | 0.24         | -0.13      | -0.08        | -0.01        | <b>0.73*</b> | 0.20         | 0.09         | 0.12        | 0.51         | <b>0.61*</b> | 0.38         | 0.10       | 0.11        | 0.71         |
| PDGF-bb     | <b>1.60*</b> | -0.58        | -1.51      | -0.65        | -0.27        | 1.33         | -0.99        | 0.05         | -0.20       | 0.65         | -2.00        | 0.25         | -1.09      | -2.00       | -0.19        |
| TGFβ        | <b>0.76*</b> | 0.00         | -0.11      | -0.22        | 0.20         | <b>0.61*</b> | -0.05        | 0.17         | 0.28        | 0.19         | 0.38         | 0.17         | 0.08       | 0.27        | 0.25         |
| Timp-1      | <b>7.21*</b> | 1.89         | 0.49       | 0.06         | 0.26         | 1.33         | 0.13         | -0.03        | 0.24        | 0.23         | 0.65         | 0.80         | 0.67       | 0.61        | 0.83         |
| TNFα        | <b>2.08*</b> | 0.99         | 0.30       | 0.30         | 0.58         | 0.80         | 0.80         | 0.80         | 0.80        | 2.26         | -0.28        | -0.59        | 1.18       | 1.39        | 2.07         |
| VEGF        | <b>2.50*</b> | 0.25         | -0.22      | -0.24        | -0.22        | -0.37        | -0.13        | -0.19        | -0.38       | -0.05        | 0.02         | -0.25        | -0.38      | -0.22       | 0.17         |

Values represent Log<sub>2</sub>-fold change compared to time-associated vehicle control.

Bold font with \* indicates significant difference from saline vehicle control (n=8; p<0.05).
